# Supplementary material for: Colloidal stability versus self-assembly of nanoparticles controlled by coiled-coil protein interactions
Source: Royal Society of Chemistry journal article supplement (doi:10.1039/c9sm01314h), 2019-01-01
Supplement: c9sm01314h1.pdf [file c9sm01314h1.pdf]

**SUPPORTING INFORMATION:**

## **Colloidal Stability versus Self-Assembly of Nanoparticles Controlled by Coiled-Coil Protein Interactions**

Allison M. Siehr,<sup>a</sup> Bin Xu,<sup>a</sup> Ronald A. Siegel,<sup>\* a,b</sup> Wei Shen<sup>\* a</sup>

<sup>a</sup>Department of Biomedical Engineering, University of Minnesota, 312 Church St. SE, 7-105 Nils Hasselmo Hall, Minneapolis, Minnesota 55455.

<sup>b</sup>Department of Pharmaceutics, University of Minnesota, 308 SE Harvard St, Room 9-177 Weaver Densford Hall, Minneapolis, Minnesota 55455.

This file includes:

1. Experimental section
2. Sequences of proteins used in this study (Table S1)
3. UV-Vis spectra of unmodified and protein conjugated GNPs (Fig. S1)
4. Guinier plot of unmodified GNPs from SAXS (Fig. S2)
5. Disassembly of self-assembled GNPs (Fig. S3)
6. Effect of higher protein packing density on self-assembly of cysA-Bcys conjugated GNPs (Fig. S4)
7. Effect of lower protein packing density on colloidal stability of cysA-cysB conjugated GNPs (Fig. S5)
8. References

### **Experimental Section**

*Protein synthesis, purification, and characterization.* The protein sequences are shown in Supplementary Table 1. The proteins cysA, Bcys, nA, and nB have been previously reported,<sup>1,2</sup> and cysB was constructed in the Qiagen pQE9 expression vector. Each protein was expressed in the *E.coli* strain SG13009 under control of the bacteriophage T5 promoter and purified through nickel-nitrilotriacetic acid (Ni-NTA) metal-affinity chromatography, as previously reported.<sup>1,2</sup> All the cysteinated proteins were purified in the presence of 1 mM TCEP to reduce disulfide bonds, and Bcys and cysB were purified in the presence of 1 mM PMSF to prevent protein degradation. Purified proteins were dialyzed against water, followed by lyophilization. The proteins were characterized by using SDS-polyacrylamide gel electrophoresis and MALDI mass spectrometry on a 5800 MALDI/TOF Mass Spectrometer (AB-SCIEx).

*Synthesis and characterization of GNPs.* The Frens-Turkevich method was used to synthesize GNPs.<sup>3</sup> Briefly, a solution of gold (III) trichloride (Sigma Aldrich) was prepared at a concentration of 0.1 mg mL<sup>-1</sup> in water and boiled under continuous stirring with a condenser apparatus attached. A solution of

trisodium citrate (Sigma Aldrich) was prepared at a concentration of 11.4 mg mL<sup>-1</sup> and added quickly to the boiling gold (III) trichloride solution at a volume ratio of 1.88:100. The mixture was boiled for an additional 8 minutes, resulting in citrate capped GNPs. The GNPs were characterized by using dynamic light scattering (DLS) and UV-Vis spectrophotometry.

*Surface modification of GNPs with proteins.* The surface of GNPs was modified with cysA and cysB (cysA-cysB GNPs) or cysA and Bcys (cysA-Bcys GNPs) through the gold-thiol reaction. The solution of each cysteinated protein (50 μM) was prepared in the presence of its non-cysteinated heterodimerizing partner (75 μM) to form heterodimers (cysA/nB, cysB/nA, Bcys/nA), so that proteins covalently conjugated on GNPs would not be closely packed. Each solution was prepared in 40 mM HEPES buffer containing 5 mM TCEP (pH 7.8) and incubated for 12 hours at 4°C. To modify GNPs, the solutions of cysB/nA and cysA/nB or the solutions of Bcys/nA and cysA/nB were mixed at a 1:1 ratio, and the mixture was added dropwise to the GNP suspension (1.53E12 GNPs mL<sup>-1</sup>) while stirring at a 1:3 ratio, followed by stirring overnight. The protein conjugated GNPs were stored at 4°C until further use and were characterized by using dynamic light scattering (DLS) and UV-Vis Spectrophotometry.

*Sample preparation for examining particle self-assembly.* The protein conjugated GNP suspensions and PBS (HyClone, 1X or 0.0067M, pH 7.4) were filtered through a 0.2-micron filter (Acrodisc). A 2 mL aliquot of each protein conjugated GNP suspension was centrifuged at 5.6krcf for 1 hour, followed by removal of 1.7 mL of the supernatant and resuspension in 1 mL of PBS. Immediately following resuspension was the Day 0 time point. Particle self-assembly was characterized by using UV-Vis Spectrophotometry, Transmission Electron Microscopy (TEM), and Small Angle X-ray Scattering (SAXS).

*Dynamic Light Scattering.* Samples were filtered through a 0.2-micron filter, and DLS was measured using a 90Plus Particle Size Analyzer (Brookhaven) at 90° scattering angle. The average hydrodynamic diameter was determined using the method of cumulants. Polydispersity values lower than 0.08 were considered to be monodisperse.

*UV-Vis Spectrophotometry.* UV-Vis spectra scanned from 350 nm to 750 nm were collected at a 600 nm min<sup>-1</sup> scanning rate and a 1 nm resolution on a Cary Win 300 UV-Vis spectrophotometer (Agilent Technologies).

*GNP size and concentration.* The UV-Vis spectra revealed the size of GNPs and the concentrations of GNP suspensions according to Equations S1 and S2:<sup>4</sup>

$$d = \exp\left(B_1 \frac{A_{SPR}}{A_{450}} - B_2\right) \quad \text{Equation S1}$$

$$N = \frac{A_{450} * 10^{14}}{d^2 \left[-0.295 + 1.36 \exp\left(-\left(\frac{d-96.8}{78.2}\right)^2\right)\right]} \quad \text{Equation S2}$$

where  $d$  is the diameter in nanometers,  $N$  is the concentration of GNPs in particles mL<sup>-1</sup>,  $A_{SPR}$  is the absorbance at the SPR peak (or maximum peak),  $A_{450}$  is the absorbance at 450 nm, and the constants  $B_1$  and  $B_2$  are 3.00 and 2.20, respectively.

*Transmission Electron Microscopy.* Samples were prepared by dropping 20 μL of a particle suspension onto a TEM grid (carbon type B, 300 mesh grid; TedPella), incubating for 20 minutes, and removing

excess liquid with a KimWipe. The TEM grids were further dried for 12 hours, and TEM images were collected on a Tecnai T12 instrument operated at 100kV.

*Small angle x-ray scattering (SAXS).* SAXS data were collected with a Cu K $\alpha$  radiation source (operated at 60 kV and 0.3 Ma) at a wavelength of 1.5409 Å on SAXSlab Ganesha (Xenocs). After a sample was incubated at room temperature for the intended time, it was pipetted up and down to ensure uniform particle suspension, and loaded into a quartz capillary tube with an inner diameter of 1.3 cm. The tube was sealed with 5-minute epoxy (Loctite) and allowed to dry overnight. All spectra were collected with the x-ray beam centered near the bottom of the capillary tube, with a 2 mm centered beam stop using 2 aperture SAXS, and were transmission corrected and thickness corrected to the inner diameter of the tube. Filtered PBS buffer was used as the background for protein conjugated GNPs; the supernatant collected from a centrifuged, unmodified GNP sample was used as the background for unmodified GNPs. Collection times for SAXS measurements were 1 hour for test samples and 30 minutes for background samples. Background subtraction of all SAXS spectra was completed using JADE software. The particle center-to-center distance  $d$  was determined from the scattering vector  $q$  according to Equation S3, where  $d$  is the interparticle distance and  $q$  is the scattering vector:<sup>5</sup>

$$d = \frac{2\pi}{q} \quad \text{Equation S3}$$

The radius of gyration was determined by a Guinier plot fit to Equation S4:<sup>6</sup>

$$\ln(I) \approx \ln(I_0) - \frac{R_g^2 q^2}{3} \quad \text{Equation S4}$$

where  $I$  is scattering intensity,  $I_0$  is the background scattering intensity,  $q$  is the scattering vector, and  $R_g$  is the radius of gyration. PRIMUS software was used.<sup>7</sup> The hard sphere radius,  $R$ , was determined from the radius of gyration according to Equation S5.<sup>8</sup>

$$R = \sqrt{\frac{5}{3}} R_g \quad \text{Equation S5}$$

*Disassembly of self-assembled GNPs.* GNPs self-assembled over 10 days were transferred to a low protein binding Eppendorf tube and heated at 80°C for 1 hour to denature the proteins. Samples were characterized using UV-Vis spectrophotometry before and after the treatment.

*Effect of higher protein packing density on self-assembly of cysA-Bcys conjugated GNPs.* It was expected that when the packing density of conjugated proteins on the GNP surface was too high for interparticle protein-protein heterodimerization to occur, self-assembly of cysA-Bcys conjugated GNPs would be inhibited. To test this hypothesis, surface modification of GNPs was conducted without non-cysteinated coiled-coil proteins (nA and nB), which were used to prevent an excessively dense packing. The nanoparticle behavior of these GNPs was examined over a time course of 10 days.

*Effect of lower protein packing density on colloidal stability of cysA-cysB conjugated GNPs.* It was expected that when the packing density of conjugated proteins on the GNP surface was too low for intraparticle coiled-coil heterodimerization to occur, colloidal stability of cysA-cysB conjugated GNPs would be impaired. To test this hypothesis, surface modification of GNPs was conducted in the presence of 0, 5, 25, and 50  $\mu\text{M}$   $\beta$ -mercaptoethanol ( $\beta\text{ME}$ ), a small thiolate that competes with thiol-mediated

protein binding to the GNP surface, to reduce protein packing density. The nanoparticle behavior of the resulting GNPs was examined.

**Table S1** The sequences of the proteins used in the study. The coiled-coil domains are highlighted in blue. The cysteine residues are highlighted in red.

|      |                                                                                            |
|------|--------------------------------------------------------------------------------------------|
| Bcys | MRGSHHHHHHGSDDDDKWASGTSGDLKNKVAQLKRKVRSLKDCAAELKQEVSRLENEIEDLKAKIGDH<br>VAPRDTSMGGC        |
| cysB | MRGSHHHHHHGSDDDDKASSGSGCSGSGTSGTSGDLKNKVAQLKRKVRSLKDCAAELKQEVSRLENEE<br>DLKAKIGDHSVAPRDTSW |
| cysA | MRGSHHHHHHGSDDDDKASSGSGCSGSGTSGDLENEVAQLEREVRSLEDEAAELEQKVSRLKNEIEDLK<br>AEIGDHSVAPRDTSW   |
| nA   | MRGSHHHHHHGSDDDDKASGDLENEVAQLEREVRSLEDEAAELEQKVSRLKNEIEDLKAEIGDHSVAPRDTSW                  |
| nB   | MRGSHHHHHHGSDDDDKASGTSGDLKNKVAQLKRKVRSLKDCAAELKQEVSRLENEIEDLKAKIGDHSVAPRDTSW               |

**Figures:**

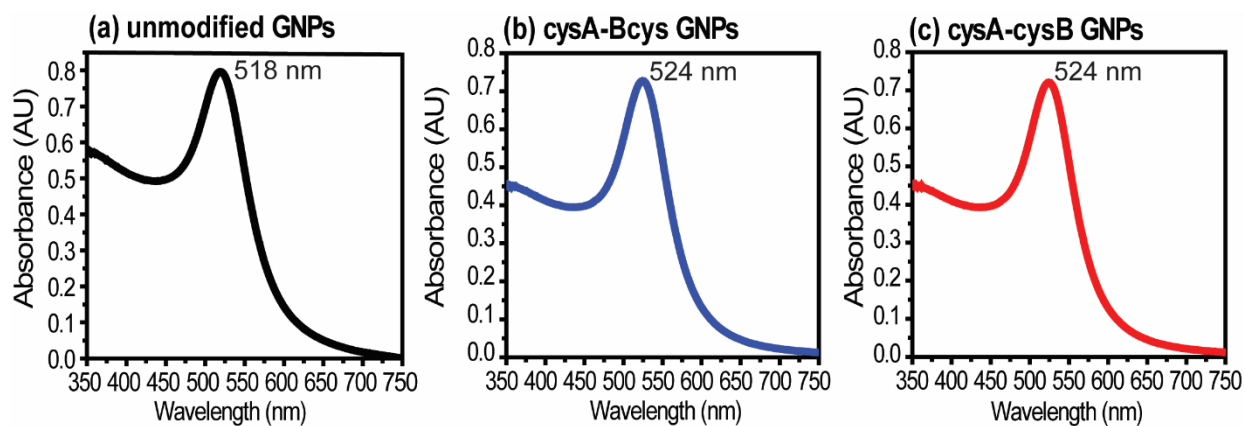

**Figure S1** The UV-Vis spectra for unmodified GNPs (a), cysA-Bcys conjugated GNPs (b), and cysA-cysB conjugated GNPs (c) reveal a red-shift of the maximum SPR peak from 518 nm for unmodified GNPs to 524 nm for protein conjugated GNPs.

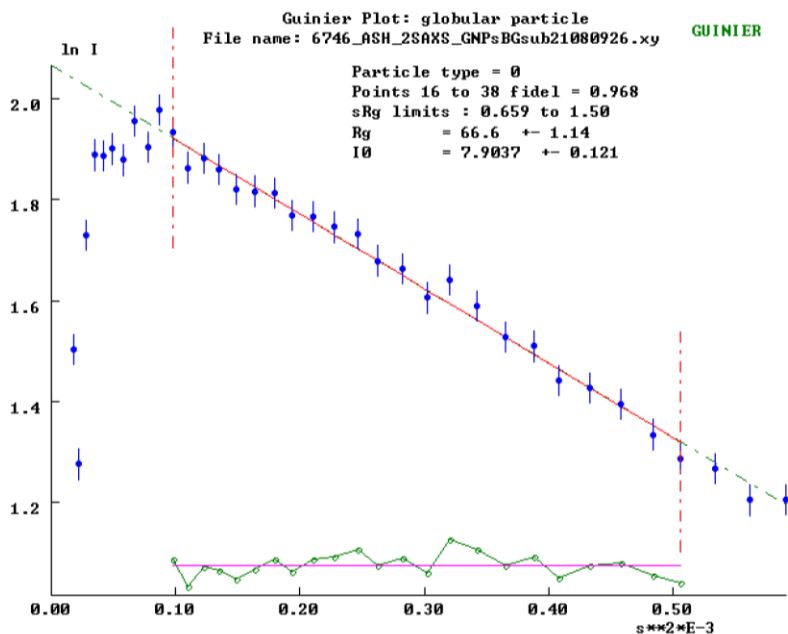

**Figure S2** Guinier plot for the SAXS data collected from unmodified GNPs.

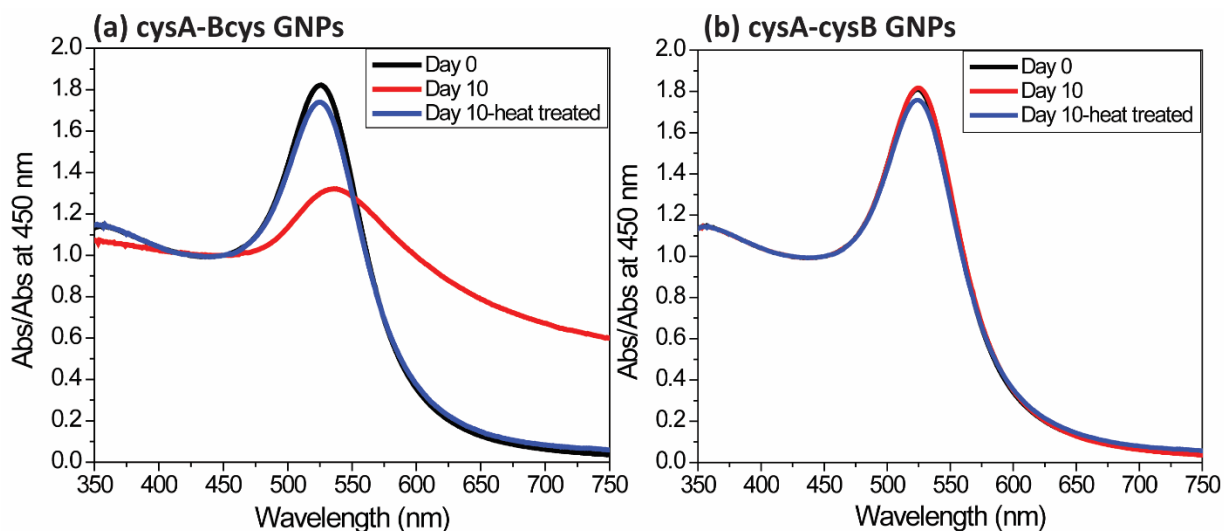

**Figure S3** UV-Vis spectra of protein conjugated GNPs on day 0, day 10, and day 10 followed with heat treatment at 80°C for cysA-Bcys GNPs (a) and cysA-cysB GNPs (b). After heat treatment, broadening of the SPR peak of cysA-Bcys GNPs disappears and the maximum SPR peak is consistent with that before assembly, suggesting that self-assembled cysA-Bcys GNPs can disassemble upon protein denaturation.

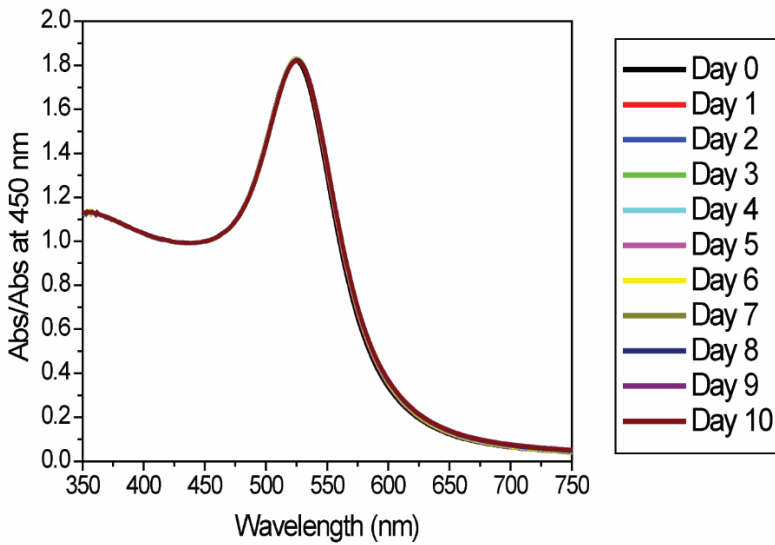

**Figure S4** UV-Vis spectra of cysA-Bcys conjugated GNPs prepared without non-cysteinated proteins examined over 10 days. The UV-Vis spectrum does not show broadening or a shift of the maximum SPR peak for both types of GNPs.

**(a) Visualization of GNPs**

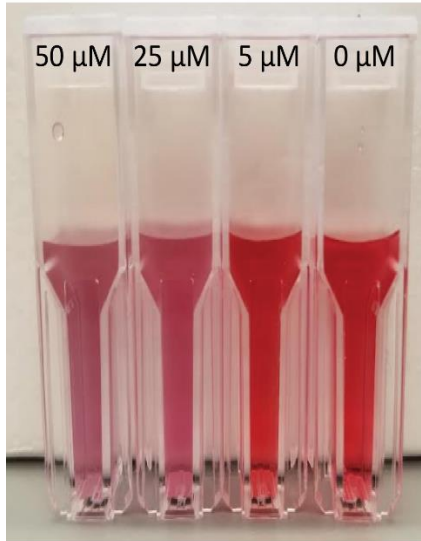

**(b) UV-Vis spectra of GNPs**

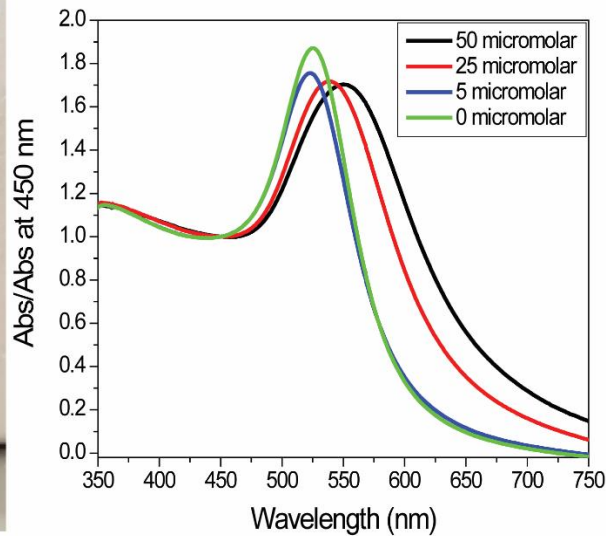

**Figure S5** The particle behavior of cysA-cysB GNPs prepared with varying concentrations of  $\beta$ -mercaptoethanol ( $\beta$ ME) on day 0. The samples prepared with high concentrations of  $\beta$ ME showed instability quickly, as revealed from the color of the particle suspensions (a) and the broadening and shift of the SPR peak (b).

## References

- 1 X. Wang, J. J. Riesberg and W. Shen, *Soft Matter*, 2012, **8**, 2812–2815.
- 2 B. Liu, Y. Liu, J. J. Riesberg and W. Shen, *J. Am. Chem. Soc.*, 2010, **132**, 13630–13632.
- 3 G. Frens, *Nat. Phys. Sci.*, 1973, **241**, 20–22.
- 4 W. Haiss, N. T. K. Thanh, J. Aveyard and D. G. Fernig, *Anal. Chem.*, 2007, **79**, 4215–4221.
- 5 A. Boal, F. Ilhan, J. DeRouchey, T. Thurn-Albrecht, T. Russell and V. Rotello, *Nature*, 2000, **404**, 746–8.
- 6 S. Doniach and J. Lipfert, *Compr. Biophys.*, 2012, **1**, 376–397.
- 7 D. Franke, M. V. Petoukhov, P. V. Konarev, A. Panjkovich, A. Tuukkanen, H. D. T. Mertens, A. G. Kikhney, N. R. Hajizadeh, J. M. Franklin, C. M. Jeffries and D. I. Svergun, *J. Appl. Crystallogr.*, 2017, **50**, 1212–1225.
- 8 L. A. Feigin and D. I. Svergun, *Structure Analysis by Small-Angle X-Ray and Neutron Scattering*, Plenum Press, New York, 1987.
